# Supplementary material for: Lysine Acetyltransferase GCN5b Interacts with AP2 Factors and Is Required for Toxoplasma gondii Proliferation
Source: PubMed Central journal article supplement (PMC3879359; doi:10.1371/journal.ppat.1003830), 2014-01-02
Supplement: ppat.1003830.s004.pdf [file ppat.1003830.s004.pdf]

## Supplemental Figure S2

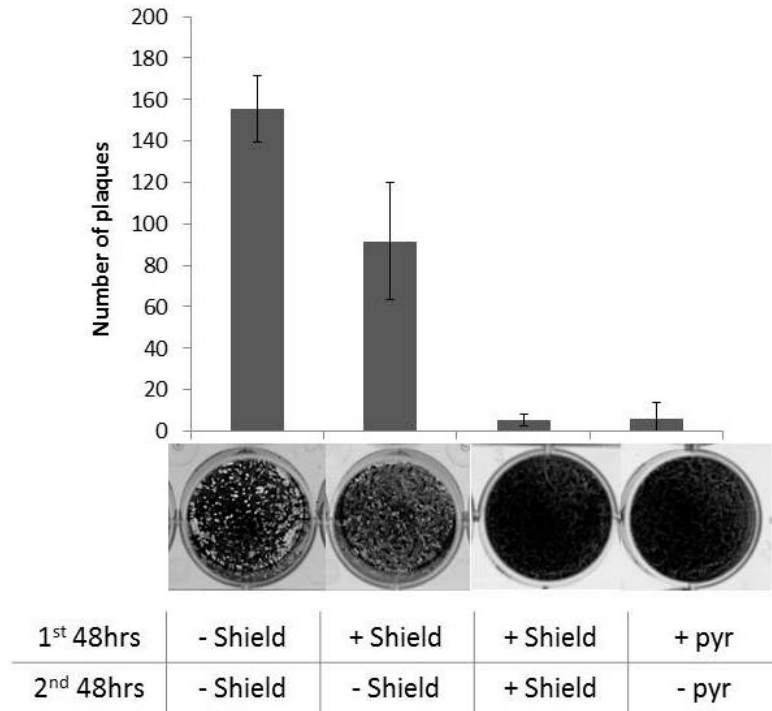

Figure S2. Stalled *ddHA* GCN5b(E703G) parasites resume replication if Shield is removed. Infected monolayers were treated with 500 nM Shield, vehicle, or 1  $\mu$ M pyrimethamine (pyr). After 48 hours, media was exchanged that lacked Shield or contained 500 nM Shield. Parasite plaques were counted two days later. Graph shows results of a representative experiment performed in triplicate. A representative infected monolayer is shown below the graph.
