# Supplementary material for: Lysine Acetyltransferase GCN5b Interacts with AP2 Factors and Is Required for Toxoplasma gondii Proliferation
Source: PubMed Central journal article supplement (PMC3879359; doi:10.1371/journal.ppat.1003830), 2014-01-02
Supplement: ppat.1003830.s005.pdf [file ppat.1003830.s005.pdf]

**Supplemental Figure S3**

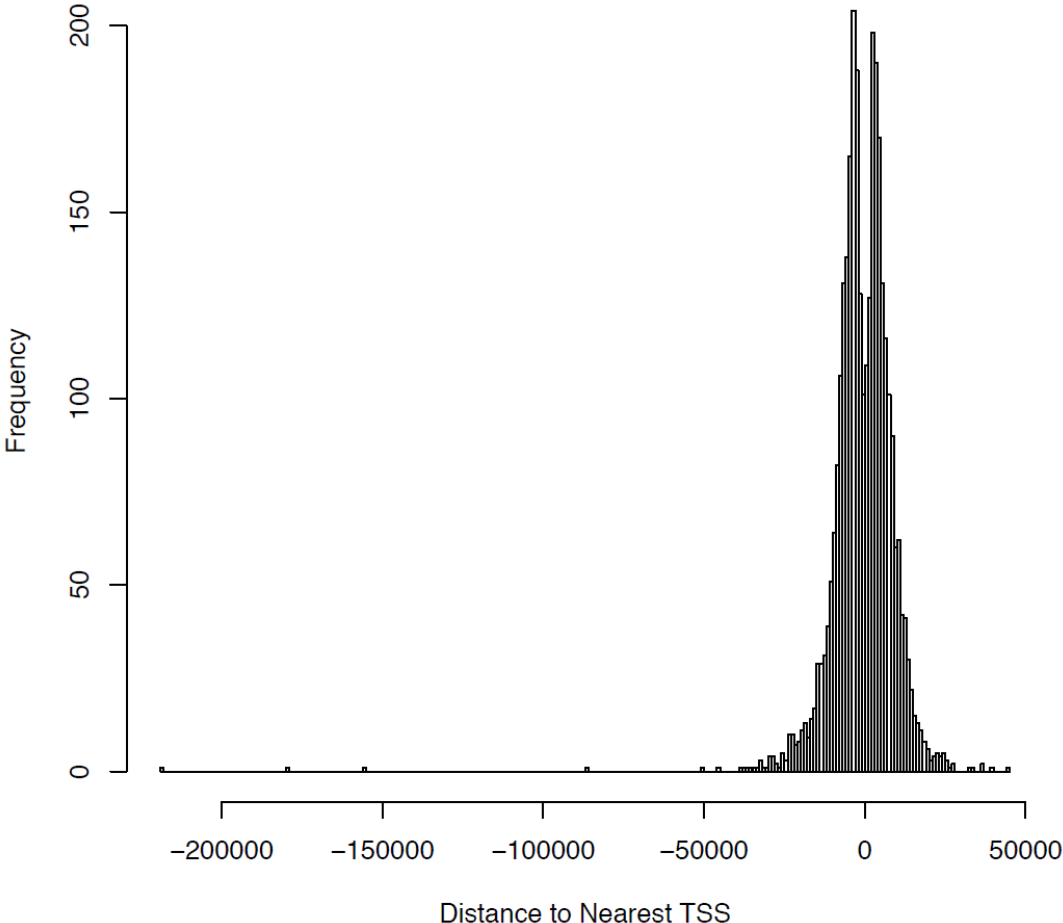

Figure S3. GCN5b distribution around transcription start sites (TSS). The distance between each GCN5b-associating site (FDR < 0.05) and the nearest TSS (based on data in Yamagishi et al. 2010) was calculated and plotted as a histogram.
